# Supplementary material
Source: Research Square preprint supplement (doi:10.21203/rs.3.rs-9649913/v1)
Supplement: Supplementary file 1 [file 169f125995c5e928d1233ba6.pdf]

## TEST REPORT

|                                                                         |                                                                                     |                                          |
|-------------------------------------------------------------------------|-------------------------------------------------------------------------------------|------------------------------------------|
| Report No: Y-05297.1                                                    | Page 1 of 4                                                                         | Date: 19/02/2026                         |
| To,<br><b>Major AP Joshi</b><br>Fateganj                                |                                                                                     |                                          |
| <b>TEST: Scanning Electron Microscopy</b>                               |                                                                                     |                                          |
| <b>TEST PROCEDURE: Based on ASM handbook Vol 9</b>                      |                                                                                     |                                          |
| Test Performed at: TCR Advanced Engineering Pvt. Ltd., Testing Division |                                                                                     |                                          |
| Instrument Utilized:                                                    | Phenom XLG2                                                                         |                                          |
| *Customer's Reference:                                                  | Letter Dated : 06.02.2026                                                           |                                          |
| Sample received on:                                                     | 06/02/2026                                                                          |                                          |
| *Condition of sample:                                                   | Test Piece                                                                          |                                          |
| *Specification:                                                         | SAE 4140                                                                            |                                          |
| Date of completion of test:                                             | 19/02/2026                                                                          | Sample Drawn by: <b>Witnessed Client</b> |
| <b>*SAMPLE ID: Coupon Sample, Code - 827</b>                            |                                                                                     |                                          |
| <b>Observation:</b>                                                     | SEM image no. 1 to 5 show Manganese Phosphate crystallite at various magnification. |                                          |
| Photographs are included on next page.                                  |                                                                                     |                                          |

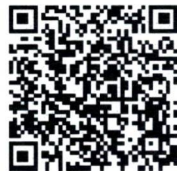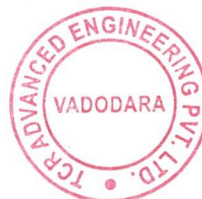

## TEST REPORT

|                      |                                                                                                                                                                                          |                  |      |
|----------------------|------------------------------------------------------------------------------------------------------------------------------------------------------------------------------------------|------------------|------|
| Report No: Y-05297.1 | Page 2 of 4                                                                                                                                                                              | Date: 19/02/2026 |      |
|                      | 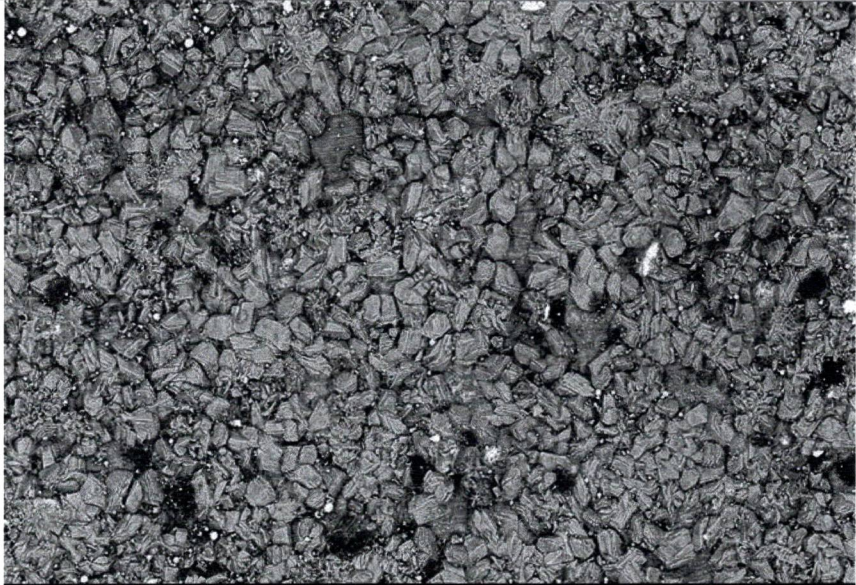 <p>200 μm    Mag. (Pol) 150 x    HV 15 kV    Det. BSD Full    WD 8.455 mm    Vac. 0.10 Pa    TCR</p> |                  |      |
| Plate 1              |                                                                                                                                                                                          |                  | 150X |
|                      |  <p>80 μm    Mag. (Pol) 500 x    HV 15 kV    Det. BSD Full    WD 8.455 mm    Vac. 0.10 Pa    TCR</p> |                  |      |
| Plate 2              |                                                                                                                                                                                          |                  | 500X |

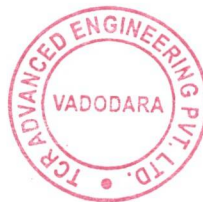

## TEST REPORT

Report No: Y-05297.1

Page 3 of 4

Date: 19/02/2026

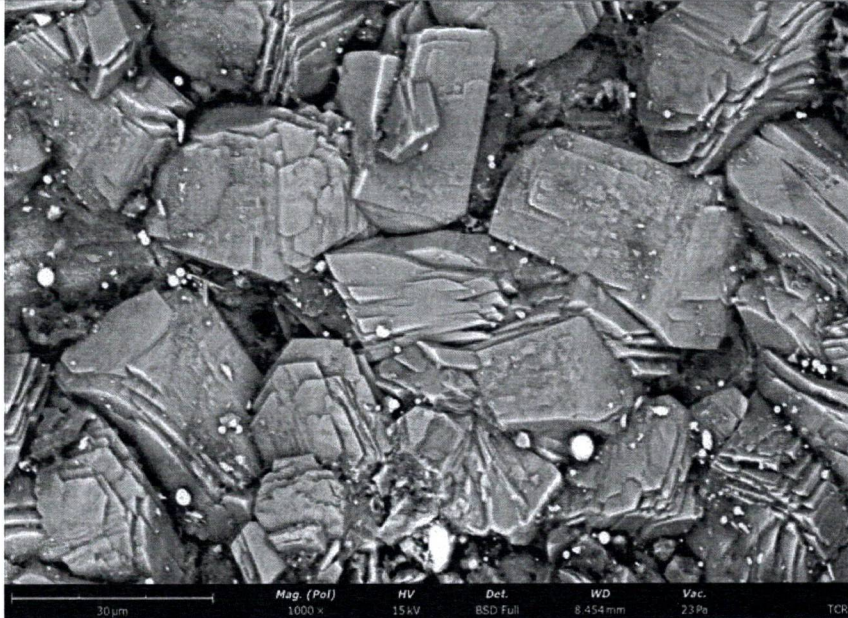

Plate 3

1000X

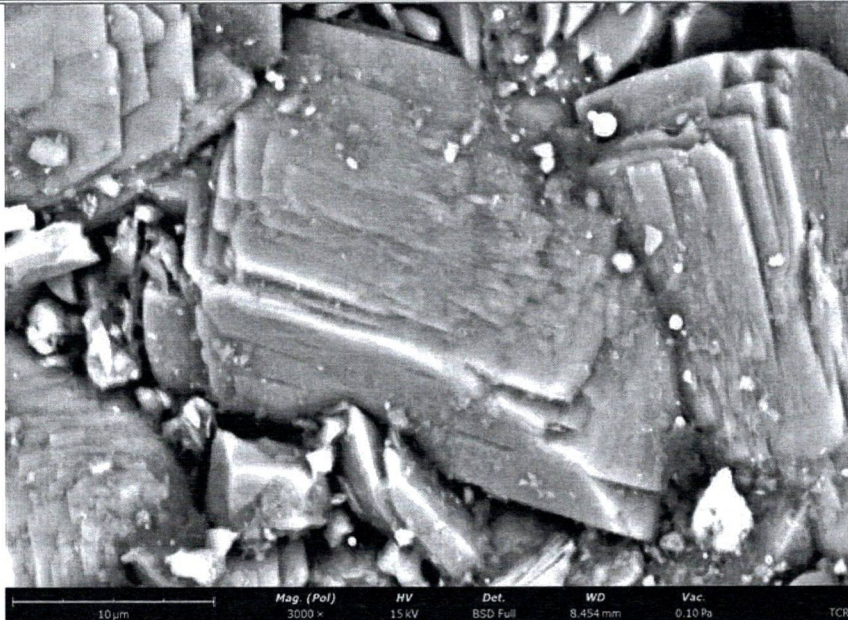

Plate 4

3000X

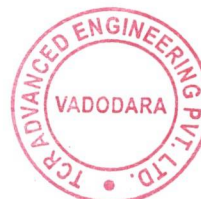

## TEST REPORT

|                                                                                     |             |                  |
|-------------------------------------------------------------------------------------|-------------|------------------|
| Report No: Y-05297.1                                                                | Page 4 of 4 | Date: 19/02/2026 |
| 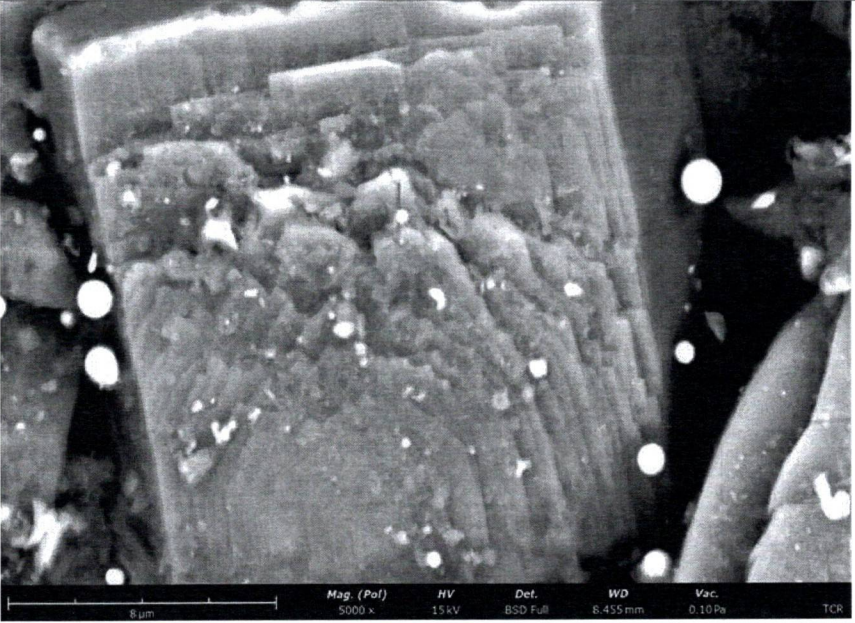 |             |                  |
| Plate 5                                                                             | 5000X       |                  |

End of report.

Checked By: Krishna Patel

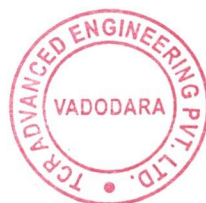


Authorised Signatory

**G. R. Patel (G.M.)**
