# Supplementary material
Source: Research Square preprint supplement (doi:10.21203/rs.3.rs-9649913/v1)
Supplement: Supplementary file 3 [file b75721fa69fed168e0500069.pdf]

## TEST REPORT

|                                                                                                                                            |                                  |                                              |                         |
|--------------------------------------------------------------------------------------------------------------------------------------------|----------------------------------|----------------------------------------------|-------------------------|
| Report No: Y05293.2                                                                                                                        | ULR - TC67392600004745F          | Date: 19/02/2026                             | Page 1 of 1             |
| To,<br><b>Major AP Joshi</b><br>Fateganj                                                                                                   |                                  |                                              |                         |
| <b>Discipline:</b> Mechanical, <b>Group:</b> Metallography Test                                                                            |                                  |                                              |                         |
| <b>TEST METHOD:</b> Coating Thickness Measurement as per ASTM B-487-20                                                                     |                                  |                                              |                         |
| Test Performed at: TCR Advanced Engineering Pvt. Ltd.                                                                                      |                                  |                                              |                         |
| Instrument Utilized:                                                                                                                       | Optical Microscope, TCRADV/E-057 |                                              |                         |
| *Customer's Reference:                                                                                                                     | Letter Dated : 06.02.2026        |                                              |                         |
| Sample received on:                                                                                                                        | 06/02/2026                       |                                              |                         |
| *Condition of sample:                                                                                                                      | Test Piece                       |                                              |                         |
| *Specification:                                                                                                                            | SAE 4140                         |                                              |                         |
| Date of completion of test:                                                                                                                | 19/02/2026                       | Sample Drawn by:                             | <b>Witnessed Client</b> |
| <b>*SAMPLE ID: Coupon Sample, Code - 751</b>                                                                                               |                                  |                                              |                         |
|  <p>Plate 1: <span style="float: right;">500X</span></p> | <b>FRAMES</b>                    | <b>Coating Thickness in <math>\mu</math></b> |                         |
|                                                                                                                                            | Layer                            | LAYER 1(Phosphate)                           |                         |
|                                                                                                                                            | 1                                | 3.93                                         |                         |
|                                                                                                                                            | 2                                | 2.21                                         |                         |
|                                                                                                                                            | 3                                | 2.21                                         |                         |
|                                                                                                                                            | 4                                | 1.96                                         |                         |
|                                                                                                                                            | 5                                | 2.70                                         |                         |
| <b>Avg. of 5 Frames</b>                                                                                                                    | <b>2.60</b>                      |                                              |                         |

Test Report subjected to terms and conditions overleaf.

(End of report.)

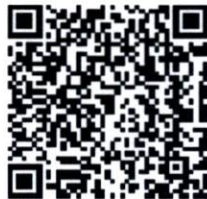

**Checked By:** Dhruvi Bhagat

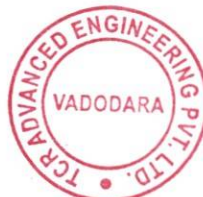

  
 Authorised Signatory  
**A. M. HARIBHAKTI (SR. L.M.)**
