# Supplementary material
Source: Research Square preprint supplement (doi:10.21203/rs.3.rs-9649913/v1)
Supplement: Supplementary file 5 [file d58c29391fba68df81a1e00d.pdf]

## TEST REPORT

|                                                                        |                                  |                  |                         |
|------------------------------------------------------------------------|----------------------------------|------------------|-------------------------|
| Report No: Y05297.2                                                    | ULR - TC67392600004746F          | Date: 19/02/2026 | Page 1 of 1             |
| To,<br><b>Major AP Joshi</b><br>Fateganj                               |                                  |                  |                         |
| <b>Discipline:</b> Mechanical, <b>Group:</b> Metallography Test        |                                  |                  |                         |
| <b>TEST METHOD:</b> Coating Thickness Measurement as per ASTM B-487-20 |                                  |                  |                         |
| Test Performed at: TCR Advanced Engineering Pvt. Ltd.                  |                                  |                  |                         |
| Instrument Utilized:                                                   | Optical Microscope, TCRADV/E-057 |                  |                         |
| *Customer's Reference:                                                 | Letter Dated : 06.02.2026        |                  |                         |
| Sample received on:                                                    | 06/02/2026                       |                  |                         |
| *Condition of sample:                                                  | Test Piece                       |                  |                         |
| *Specification:                                                        | SAE 4140                         |                  |                         |
| Date of completion of test:                                            | 19/02/2026                       | Sample Drawn by: | <b>Witnessed Client</b> |

**\*SAMPLE ID: Coupon Sample, Code - 827**

|                                                                                    |                         |                                              |
|------------------------------------------------------------------------------------|-------------------------|----------------------------------------------|
|  | <b>FRAMES</b>           | <b>Coating Thickness in <math>\mu</math></b> |
|                                                                                    | Layer                   | LAYER 1(Phosphate)                           |
|                                                                                    | 1                       | 1.72                                         |
|                                                                                    | 2                       | 2.22                                         |
|                                                                                    | 3                       | 2.46                                         |
|                                                                                    | 4                       | 2.46                                         |
|                                                                                    | 5                       | 2.22                                         |
|                                                                                    | <b>Avg. of 5 Frames</b> | <b>2.22</b>                                  |

Plate 1: 500X

Test Report subjected to terms and conditions overleaf.

(End of report.)

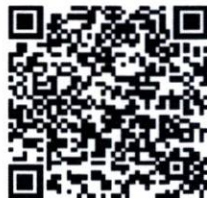

**Checked By:** Dhruvi Bhagat

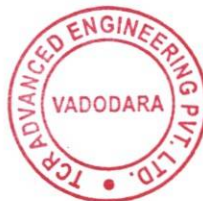

  
 \* Authorised Signatory  
**A. M. HARIBHAKTI (SR. L.M.)**
