# Supplementary material
Source: Research Square preprint supplement (doi:10.21203/rs.3.rs-9649913/v1)
Supplement: Supplementary file 6 [file e798491faee15a4c574f6032.pdf]

## TEST REPORT

|                                                           |                                    |                  |              |
|-----------------------------------------------------------|------------------------------------|------------------|--------------|
| Report No: Y-05296.1                                      | ULR – TC67392600003864F            | Date: 13/02/2026 | Page 1 of 2  |
| To,<br><b>Major AP Joshi.</b><br>Fateganj                 |                                    |                  |              |
| <b>Discipline:</b> Chemical, <b>Group:</b> Corrosion test |                                    |                  |              |
| <b>TEST: Salt Spray Test</b>                              |                                    |                  |              |
| <b>TEST METHOD: ASTM B117 – 19</b>                        |                                    |                  |              |
| Test Performed at: TCR Advanced Engineering Pvt. Ltd.     |                                    |                  |              |
| Instrument Utilized:                                      | Salt Spray Apparatus: TCRADV/E-359 |                  |              |
| *Customer's Reference:                                    | Letter Dated: 06.02.2026           |                  |              |
| Sample received on:                                       | 06-02-2026                         |                  |              |
| *Condition of sample:                                     | Test Piece                         |                  |              |
| *Specification:                                           | -                                  |                  |              |
| Date of performance of test:                              | 09-02-2026                         |                  |              |
| Date of completion of test:                               | 12-02-2026                         | Sample Drawn by: | <b>Party</b> |
| Test Exposure Time:                                       | 72 hours                           |                  |              |
| Observation Interval:                                     | 24 hours                           |                  |              |
| <b>*Sample ID - Coupon Sample, Code - 751</b>             |                                    |                  |              |
| Test Solution                                             | 5 % NaCl                           |                  |              |
| Test Temperature                                          | 35 °C                              |                  |              |
| Volume of salt solution collected per 24 hours            | 36.8                               |                  |              |
| pH of the salt solution                                   | 6.8                                |                  |              |
| Specific Gravity (Solution Concentration)                 | 1.032                              |                  |              |
| <b>Observation:</b>                                       |                                    |                  |              |
| After 24 hours                                            | Red rust observed.                 |                  |              |
| After 48 hours                                            | Increase in red rust observed.     |                  |              |
| After 72 hours                                            | Increase in red rust observed.     |                  |              |

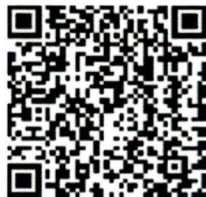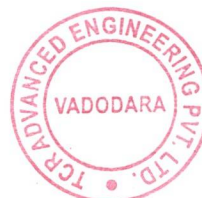

## TEST REPORT

|                                                                                     |                                                                                      |                  |             |
|-------------------------------------------------------------------------------------|--------------------------------------------------------------------------------------|------------------|-------------|
| Report No: Y-05296.1                                                                | ULR – TC673926000003864F                                                             | Date: 13/02/2026 | Page 2 of 2 |
|    |    |                  |             |
| Photograph before testing (Side 1)                                                  | Photograph before testing (Side 2)                                                   |                  |             |
|   |   |                  |             |
| Photograph after 24 hrs (Side 1)                                                    | Photograph after 24 hrs (Side 2)                                                     |                  |             |
|  |  |                  |             |
| Photograph after 48 hrs (Side 1)                                                    | Photograph after 48 hrs (Side 2)                                                     |                  |             |
|  |  |                  |             |
| Photograph after 72 hrs (Side 1)                                                    | Photograph after 72 hrs (Side 2)                                                     |                  |             |

Test Report subjected to terms and conditions overleaf.

(End of report.)

Checked by: Ankit Padhiyar

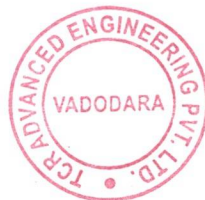

*H. R. Shah*  
 Authorised Signatory  
 H. R. SHAH (Q.M.)
